# Supplementary material
Source: publisher figshare collection journal article supplement (https://karger.figshare.com/ndownloader/files/22162803)
Supplement: Supplementary file 1 [file 22162803]

**Supplementary Table S1.** Univariable and multivariable analyses of clinicopathologic factors for RFS by individual 55GC subgroups.

| Variable | | Univariable analysis | | | Multivariable analysis | | |
| --- | --- | --- | --- | --- | --- | --- | --- |
|  |  | HR | 95% CI | *P* | HR | 95% CI | *P* |
| Age (years) | < 70 *v* ≥ 70 | 0.957 | 0.519 to 1.764 | 0.8876 |  |  |  |
| Sex | male *v* female | 0.758 | 0.416 to 1.379 | 0.3638 |  |  |  |
| Preoperative CEA | ≥ 5.0 *v* < 5.0 ng/mL | 1.233 | 0.664 to 2.290 | 0.5068 |  |  |  |
| Tumor location | right *v* left colon | 0.768 | 0.410 to 1.438 | 0.4093 |  |  |  |
| T stage | T4 *v* T3 | 2.281 | 1.056 to 4.929 | 0.0359 | 2.436 | 1.122 to 5.288 | 0.0244 |
| Histology | muc *v* non muc | 0.644 | 0.089 to 4.680 | 0.6634 |  |  |  |
| Tumor grade | por & muc *v* tub | 0.293 | 0.040 to 2.130 | 0.2253 |  |  |  |
| Lymphatic invasion | positive *v* negative | 1.853 | 1.012 to 3.395 | 0.0457 |  |  |  |
| Venous invasion | positive *v* negative | 2.312 | 1.108 to 4.823 | 0.0255 |  |  |  |
| Nodes examined | < 12 *v* ≥ 12 | 2.092 | 1.053 to 4.156 | 0.0351 | 2.235 | 1.120 to 4.461 | 0.0226 |
| MMR status | deficient *v* proficient | 0.188 | 0.026 to 1.364 | 0.0983 |  |  |  |
| 55GC subtype | CIN-like *v* MSI-like | 1.407 | 0.573 to 3.451 | 0.4560 | 1.243 | 0.502 to 3.082 | 0.6383 |
| 55GC subtype | stromal *v* MSI-like | 2.870 | 1.219 to 6.752 | 0.0158 | 2.750 | 1.168 to 6.476 | 0.0206 |
| *RAS* | mutant *v* wild-type | 1.190 | 0.652 to 2.174 | 0.5706 |  |  |  |

Note: CEA: Carcinoembryonic antigen;muc: mucinous adenocarcinoma; por: poorly differentiated adenocarcinoma; tub: tubular adenocarcinoma; MMR: mismatch repair
